# Supplementary material for: High-efficiency solution-processed triplet–triplet annihilation organic light-emitting diodes using oligocarbazole- and benzonitrile-modified polyaromatic blue fluorescent emitters
Source: Royal Society of Chemistry journal article supplement (doi:10.1039/d4tc02847c), 2024-01-01
Supplement: d4tc02847c1.pdf [file d4tc02847c1.pdf]

## Supporting Information

### High-efficiency solution-processed triplet-triplet annihilation organic light-emitting diodes using oligocarbazole- and benzonitrile-modified polyaromatic blue fluorescent emitters

Ruttapol Malatong,<sup>a</sup> Thidarat Loythaworn,<sup>a</sup> Suangsiri Arunlimsawat,<sup>a</sup> Pongsakorn Chasing,<sup>a</sup> Pattarawadee Therdkatanyuphong,<sup>a</sup> Wijitra Waengdongbung,<sup>a</sup> Taweesak Sudyoadsuk,<sup>b</sup> and Vinich Promarak<sup>\*a</sup>

<sup>a</sup>Department of Materials Science and Engineering, School of Molecular Science and Engineering, Vidyasirimedhi Institute of Science and Technology, Wangchan, Rayong 21210 Thailand

<sup>b</sup>Frontier Research Center (FRC), Vidyasirimedhi Institute of Science and Technology, Wangchan, Rayong 21210, Thailand.

#### Materials synthesis and characterization

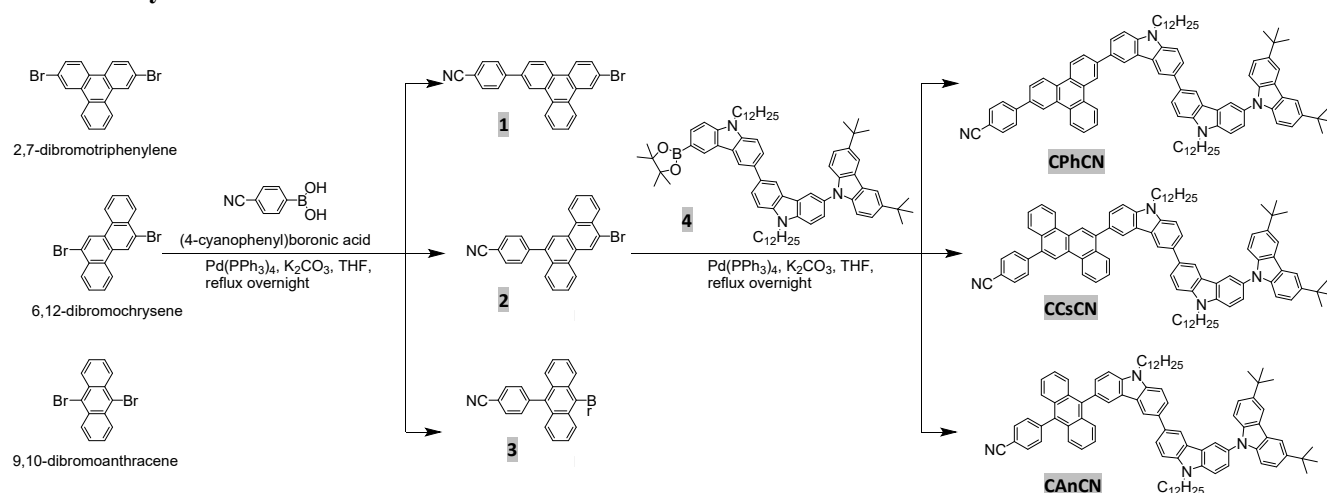

Scheme 1. Synthetic routes of CPhCN, CPhCN and CAnCN

#### 4-(7-Bromotriphenyl-2-yl)benzonitrile (1)

2,7-Dibromotriphenylene (1.0 g, 2.6 mmol) and 4-cyanophenylboronic acid (132 mg, 0.9 mmol) were dissolved in dried THF (60 mL) under nitrogen atmosphere. 10% K<sub>2</sub>CO<sub>3</sub> (aq) (10ml) was added, the mixture was stirred at ambient temperature. Tetrakis(triphenylphosphene)palladium(0), Pd(PPh<sub>3</sub>)<sub>4</sub> (52 mg, 0.05 mmol) was then added and degassed the reaction mixture for 10 minutes. The reaction mixture was heated to reflux. After 18 h, cooled to room temperature and water was added to the reaction mixture. The resulting solution was extracted by dichloromethane (3 x 50 mL) and the organic layer was washed with brine (3 x 20 mL), dried (Na<sub>2</sub>SO<sub>4</sub>) and concentrated *in vacuo*. Purification by column chromatography on silica gel eluting with gradient hexane:dichloromethane from 100% to 50% gave white solids (270 mg, 74%). *m/z* APCI Found: [M + H]<sup>+</sup>, 409.9523; <sup>1</sup>H NMR (600 MHz, CDCl<sub>3</sub>) δ 8.83 (1H, s, Ar-*H*), 8.79 (1H, d, *J* = 1.9 Hz, Ar-*H*), 8.73 – 8.70 (1H, m, Ar-*H*), 8.68 (1H, d, *J* = 8.5 Hz, Ar-*H*), 8.62 – 8.57 (1H, m, Ar-*H*), 8.52 (1H, d, *J* = 8.7 Hz, Ar-*H*), 7.90 – 7.87 (3H, m, Ar-*H*), 7.82 (1H, d, *J* = 8.0 Hz, Ar-*H*), 7.78 (1H, dd, *J* = 8.6, 1.9 Hz, Ar-*H*), 7.76 – 7.69 (2H, m, Ar-*H*); <sup>13</sup>C NMR (151 MHz, CDCl<sub>3</sub>) δ 145.4, 138.1, 132.8, 131.8, 130.5, 129.8, 129.3, 129.0, 128.1, 128.0, 127.9, 126.4, 126.2, 125.2, 124.2, 123.6, 123.3, 122.2, 118.9, 111.3.

#### 4-(12-Bromochrysen-6-yl)benzonitrile (2)

6,12-Dibromochrysen (700 mg, 1.80 mmol) and 4-cyanophenylboronic acid (88 mg, 0.6 mmol) were dissolved in dried THF (60 mL) under nitrogen atmosphere. 10% K<sub>2</sub>CO<sub>3</sub> (aq) (10ml) was added, the mixture was stirred at ambient temperature. Tetrakis(triphenylphosphene)palladium(0) Pd(PPh<sub>3</sub>)<sub>4</sub> (35 mg, 5 mol%) was then added and degassed the reaction mixture for 10 minutes. The reaction mixture was heated to reflux. After 18 h the reaction was stopped, cooled to room temperature and water was added to the reaction mixture. The resulting solution was extracted by dichloromethane (3 x 50 mL) and the organic layer was washed with brine (3 x 20 mL), dried (Na<sub>2</sub>SO<sub>4</sub>) and concentrated *in vacuo*. Purification by column chromatography on silica gel eluting with gradient hexane:dichloromethane from 100% to 50% gave light yellow solids (147 mg, 60%). *m/z* APCI Found: [M + H]<sup>+</sup>, 409.9745; <sup>1</sup>H NMR (600 MHz, CDCl<sub>3</sub>) δ 9.09 (1H, s, Ar-H), 8.80 (1H, d, *J* = 8.4 Hz, Ar-H), 8.78 – 8.73 (1H, m, Ar-H), 8.56 (1H, s, Ar-H), 8.50 – 8.45 (1H, m, Ar-H), 7.92 – 7.84 (m, 3H), 7.81 – 7.72 (m, 5H), 7.62 (1H, ddd, *J* = 8.1, 6.8, 1.2 Hz, Ar-H); <sup>13</sup>C NMR (151 MHz, CDCl<sub>3</sub>) δ 145.9, 137.8, 132.3, 131.4, 130.9, 130.8, 130.4, 130.0, 128.7, 128.3, 127.8, 127.8, 127.3, 127.2, 127.1, 126.2, 125.3, 123.6, 123.5, 123.3, 122.3, 118.8, 111.6.

#### 4-(10-Bromoanthracen-9-yl)benzonitrile (3)

9,10-Dibromoanthracene (1.4 g, 4.08 mmol) and 4-cyanophenylboronic acid (200 mg, 1.36 mmol) were dissolved in dried THF (30 mL) under nitrogen atmosphere. 10% K<sub>2</sub>CO<sub>3</sub> (aq) (10ml) was added, the mixture was stirred at ambient temperature. Tetrakis(triphenylphosphene)palladium(0) Pd(PPh<sub>3</sub>)<sub>4</sub> (78.6 mg, 5 mol%) was then added and degassed the reaction mixture for 10 minutes. The reaction mixture was heated to reflux. After 18 h the reaction was stopped, cooled to room temperature and water was added to the reaction mixture. The resulting solution was extracted by dichloromethane (3 x 50 mL) and the organic layer was washed with brine (3 x 20 mL), dried (Na<sub>2</sub>SO<sub>4</sub>) and concentrated *in vacuo*. Purification by column chromatography on silica gel eluting with gradient hexane:dichloromethane from 100% to 50% gave light yellow solids (318 mg, 65%). *m/z* APCI Found: [M + H]<sup>+</sup>, 358.0166; <sup>1</sup>H NMR (600 MHz, CDCl<sub>3</sub>) δ 8.59 (2H, dt, *J* = 8.9, 0.9 Hz, Ar-H), 7.70 – 7.64 (4H, m, Ar-H), 7.62 (2H, dt, *J* = 8.8, 0.9 Hz, Ar-H), 7.58 (2H, ddd, *J* = 8.9, 6.5, 1.2 Hz, Ar-H), 7.37 (2H, ddd, *J* = 8.7, 6.5, 1.1 Hz, Ar-H), 7.34 (3H, dd, *J* = 5.0, 1.9 Hz, Ar-H), 7.31 – 7.24 (8H, m, Ar-H), 7.23 – 7.17 (5H, m, Ar-H); <sup>13</sup>C NMR (151 MHz, CDCl<sub>3</sub>) δ 146.6, 138.5, 138.3, 137.2, 137.2, 134.4, 131.2, 131.0, 130.9, 130.7, 130.2, 130.1, 129.2, 128.6, 128.5, 128.4, 128.2, 128.1, 127.9, 127.4, 127.3, 126.9, 126.7, 125.6, 122.8.

#### Characterization data

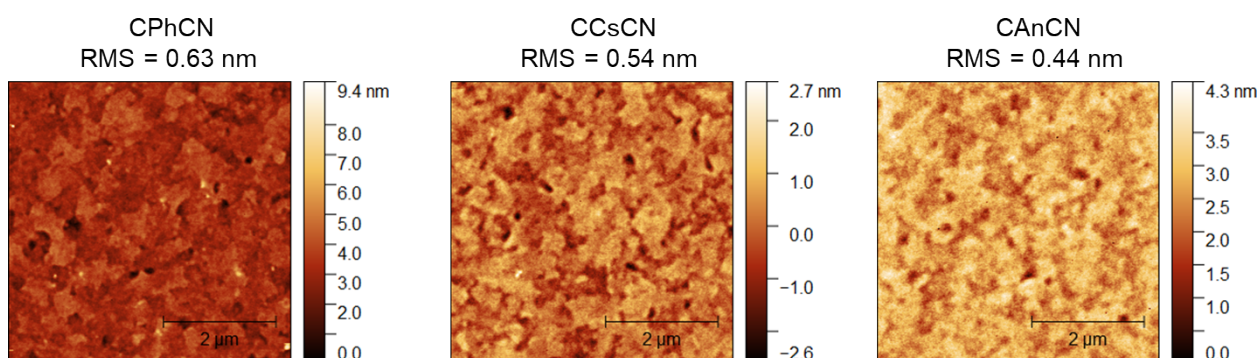

Fig. S1 AFM images of spin-coated thin films.

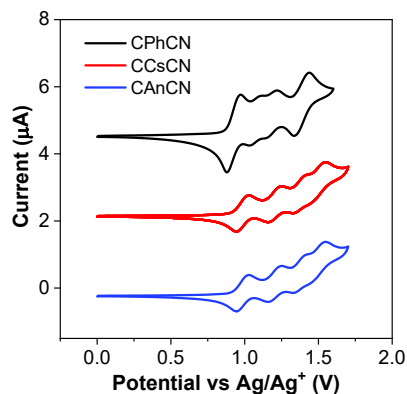

**Fig. S2** CV voltammograms measured in dichloromethane solutions containing 0.1 M n-Bu<sub>4</sub>NPF<sub>6</sub> at a scan rate of 50 mV s<sup>-1</sup>.

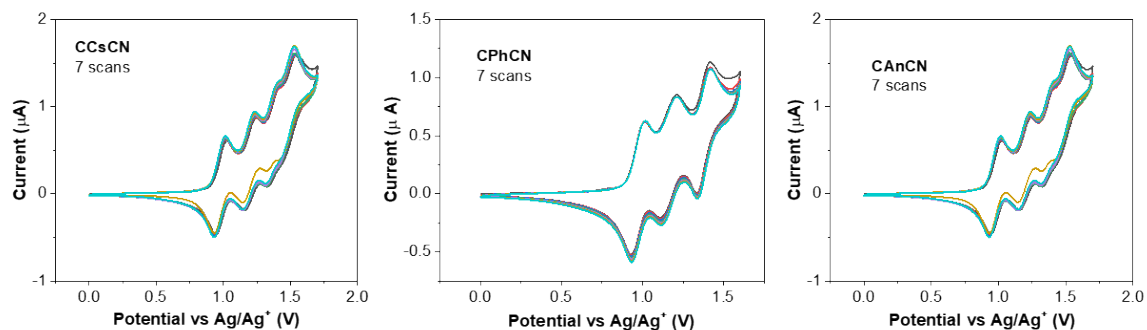

**Fig. S3** Multiple scan CV plots measured in dichloromethane solutions containing 0.1 M n-Bu<sub>4</sub>NPF<sub>6</sub> at a scan rate of 50 mV s<sup>-1</sup>.

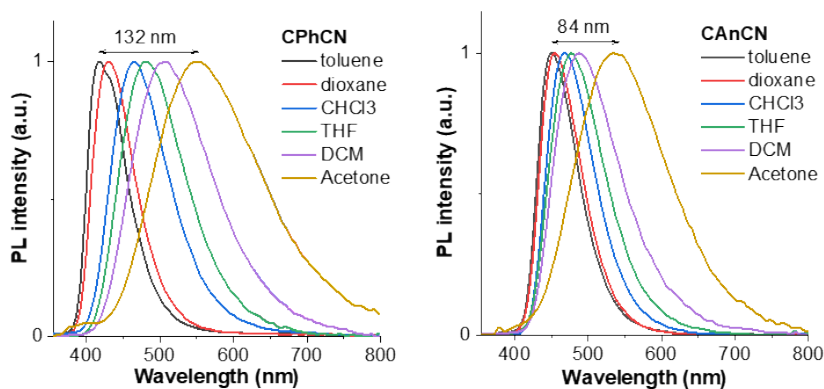

**Fig. S4** PL spectra in various solvents with different polarities.

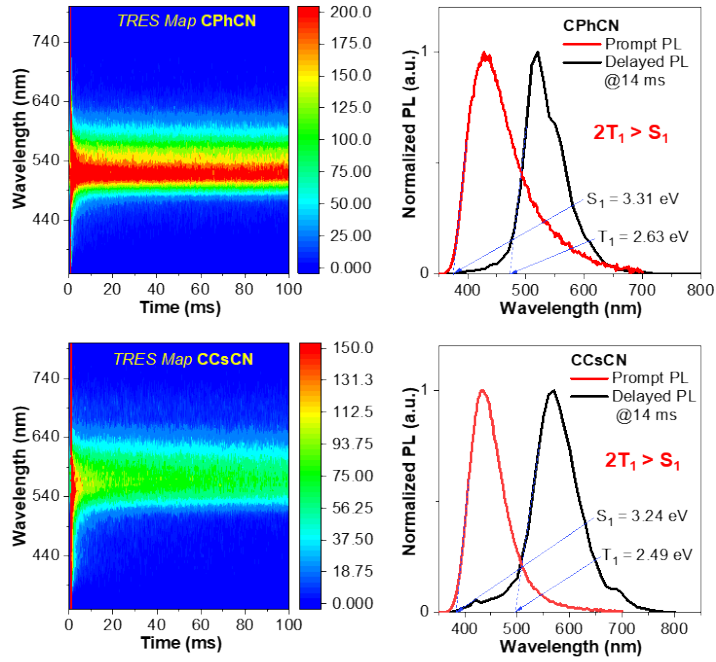

**Fig. S5** a) TRES map profile and b) integrated TRES slice of prompt PL spectra and delayed PL spectra @14 ms of CPhCN/CCsCN 2 wt% doped poly(methyl methacrylate) films covered with EXCEVAL™ film.

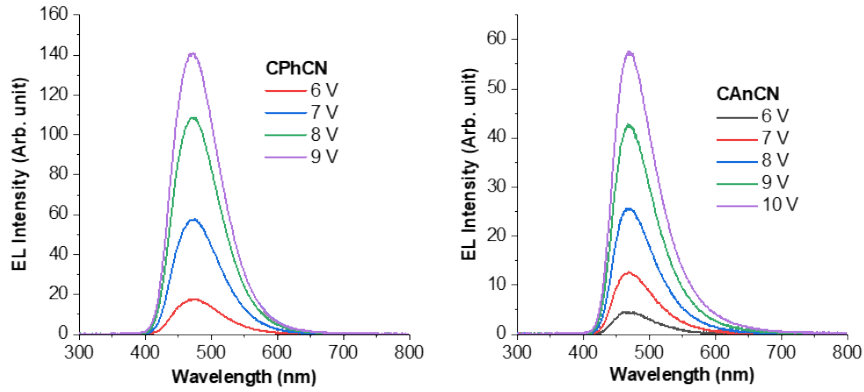

**Fig. S6** EL spectra under different operating voltages of CPhCN and CAnCN-based devices.

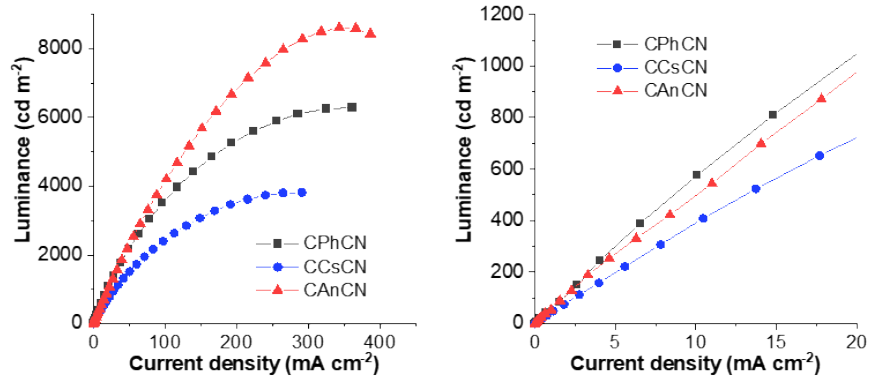

**Fig. S7** Luminance–current density ( $L$ - $J$ ) characteristic of the non-doped solution-processed OLEDs.

Fig. S8 Copies of  $^1\text{H}$ -NMR,  $^{13}\text{C}$ -NMR, and HRMS spectra of the synthesized compounds.

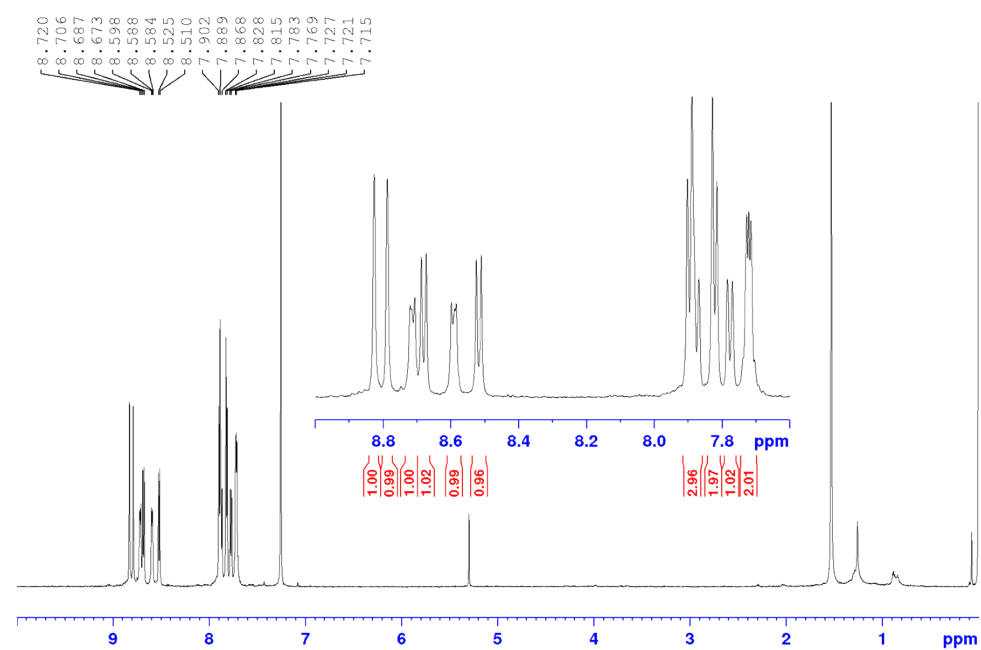

$^1\text{H}$  NMR spectrum of 4-(7-bromotriphenylen-2-yl)benzonitrile (1)

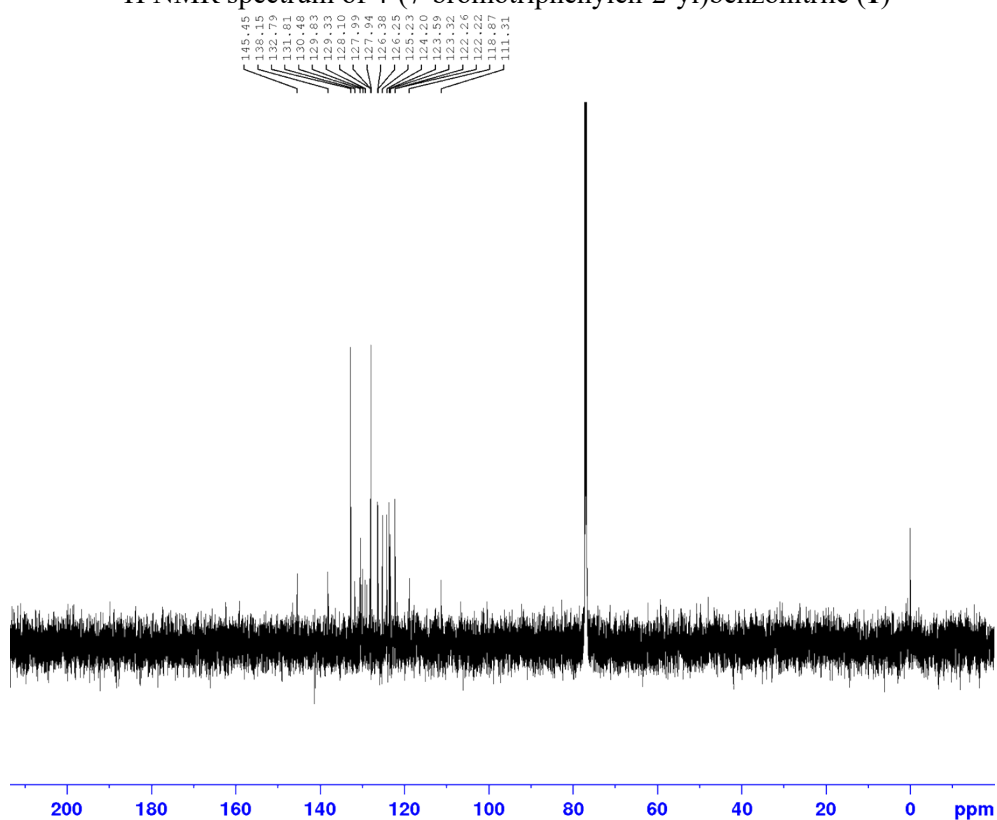

$^{13}\text{C}$  NMR spectrum of 4-(7-bromotriphenylen-2-yl)benzonitrile (1)

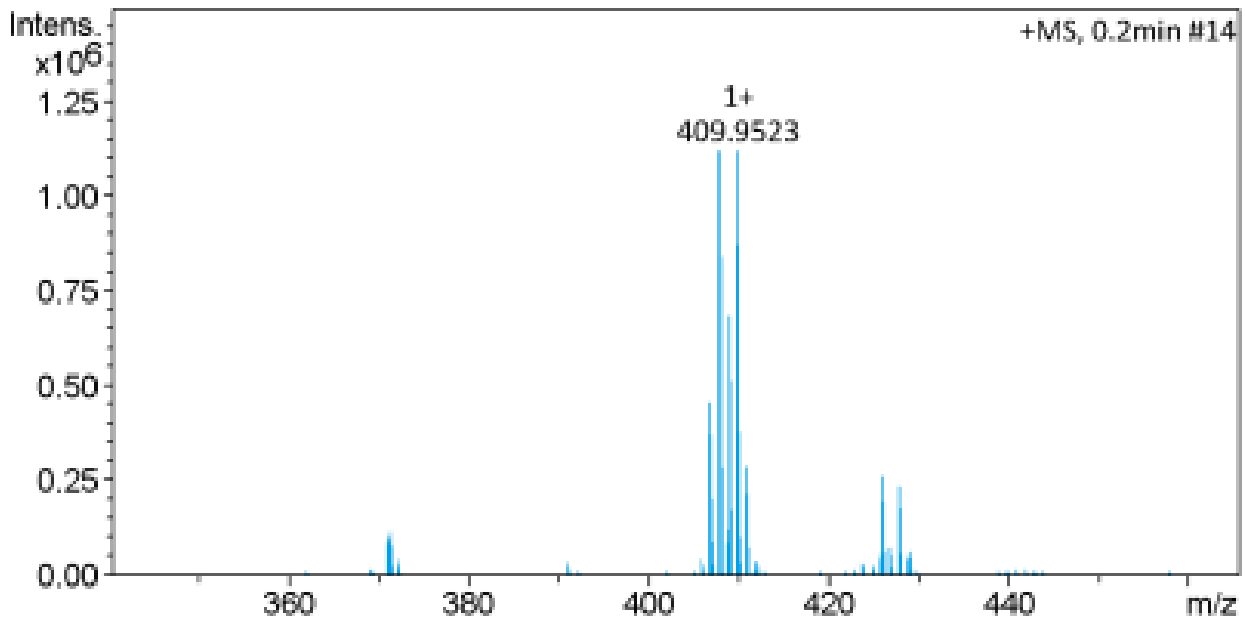

Mass spectrum of 4-(7-bromotriphenyl-2-yl)benzotrile (1)

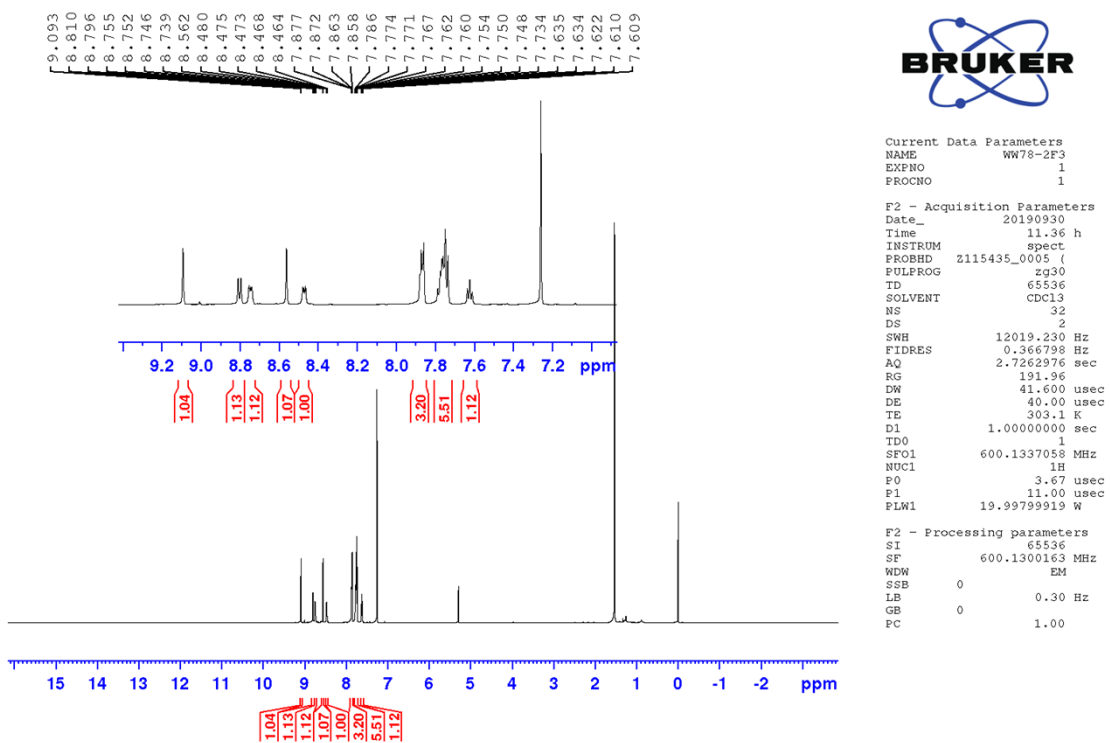

<sup>1</sup>H NMR spectrum of 4-(12-Bromochrysen-6-yl)benzotrile (2)

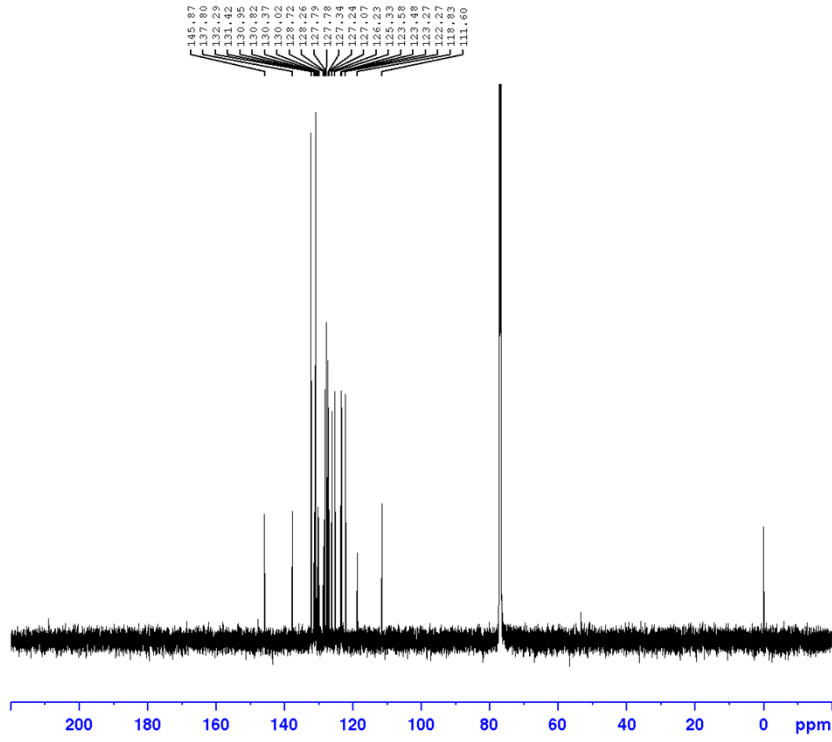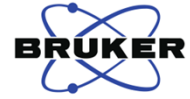

Current Data Parameters  
 NAME WW78-2F3  
 EXPNO 10  
 PROCNO 1  
  
 F2 - Acquisition Parameters  
 Date\_ 20190930  
 Time 15:59 h  
 INSTRUM spect  
 PROBHD Z115435\_0005 (  
 PULPROG zgpg30  
 TD 65536  
 SOLVENT CDCl3  
 NS 256  
 DS 2  
 SWH 36231.883 Hz  
 FIDRES 1.105709 Hz  
 AQ 0.9043968 sec  
 RG 191.96  
 DW 13.800 usec  
 DE 18.00 usec  
 TE 303.1 K  
 D1 2.00000000 sec  
 D11 0.03000000 sec  
 TD0 1  
 SFO1 150.9178988 MHz  
 NUC1 13C  
 P0 3.60 usec  
 P1 10.80 usec  
 PLW1 26.00000000 W  
 SFO2 600.1324005 MHz  
 NUC2 1H  
 CPDPRG2 waltz16  
 PCPD2 70.00 usec  
 PLW2 19.99799919 W  
 PLW12 0.49383000 W  
 PLW13 0.24839000 W  
  
 F2 - Processing parameters  
 SI 32768  
 SF 150.9028085 MHz  
 WDW EM  
 SSB 0  
 LB 1.00 Hz  
 GB 0  
 PC 1.40

<sup>13</sup>C NMR spectrum of 4-(12-Bromochrysen-6-yl)benzotrile (2)

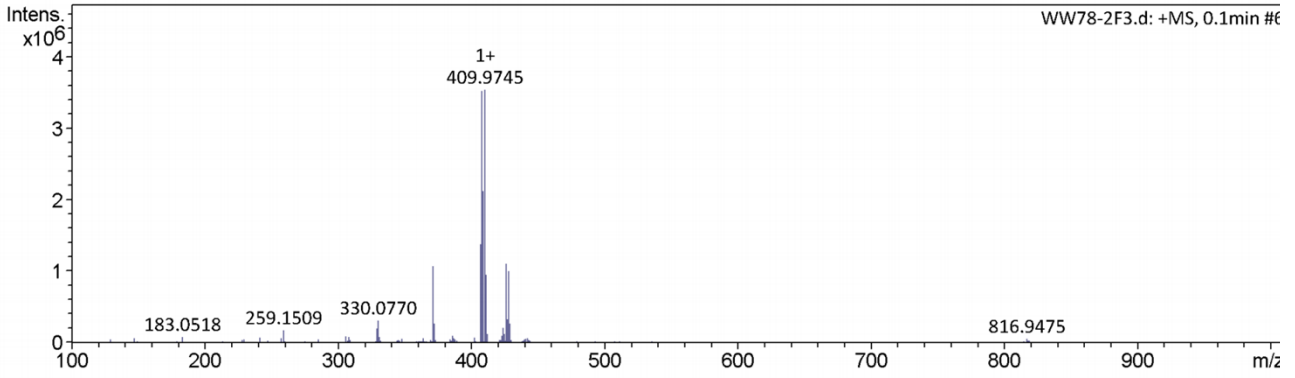

Mass spectrum of 4-(12-Bromochrysen-6-yl)benzotrile (2)

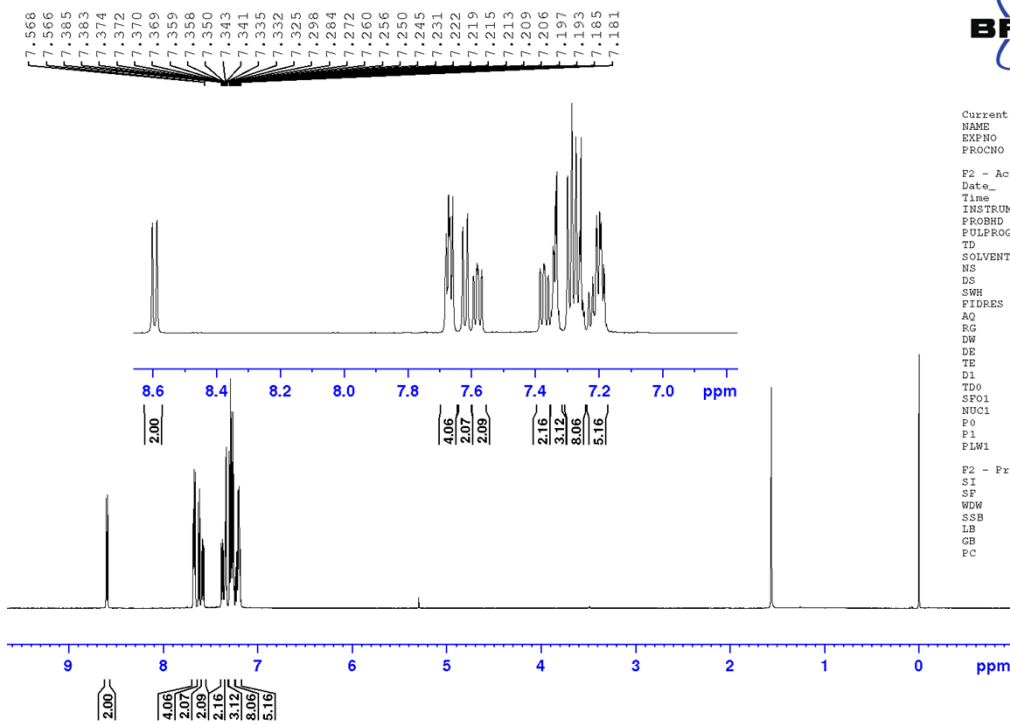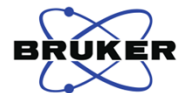

Current Data Parameters  
 NAME RM01-67 CC 19-Aug-19  
 EXPNO 1  
 PROCNO 1

F2 - Acquisition Parameters  
 Date\_ 20190819  
 Time 13.52 h  
 INSTRUM spect  
 PROBHD Z115435\_0005 ( )  
 PULPROG zg30  
 TD 65536  
 SOLVENT CDCl3  
 NS 8  
 DS 2  
 SWH 12019.230 Hz  
 FIDRES 0.366798 Hz  
 AQ 2.7262976 sec  
 RG 130.93  
 DW 41.600 usec  
 DE 40.00 usec  
 TE 303.1 K  
 D1 1.0000000 sec  
 TD0 1  
 SFO1 600.1337058 MHz  
 NUC1 1H  
 P0 3.67 usec  
 P1 11.00 usec  
 PLW1 19.99799919 W

F2 - Processing parameters  
 SI 65536  
 SF 600.1300174 MHz  
 WDW EM  
 SSB 0  
 LB 0.30 Hz  
 GB 0  
 PC 1.00

<sup>1</sup>H NMR spectrum of 4-(10-bromoanthracen-9-yl)benzonitrile (3)

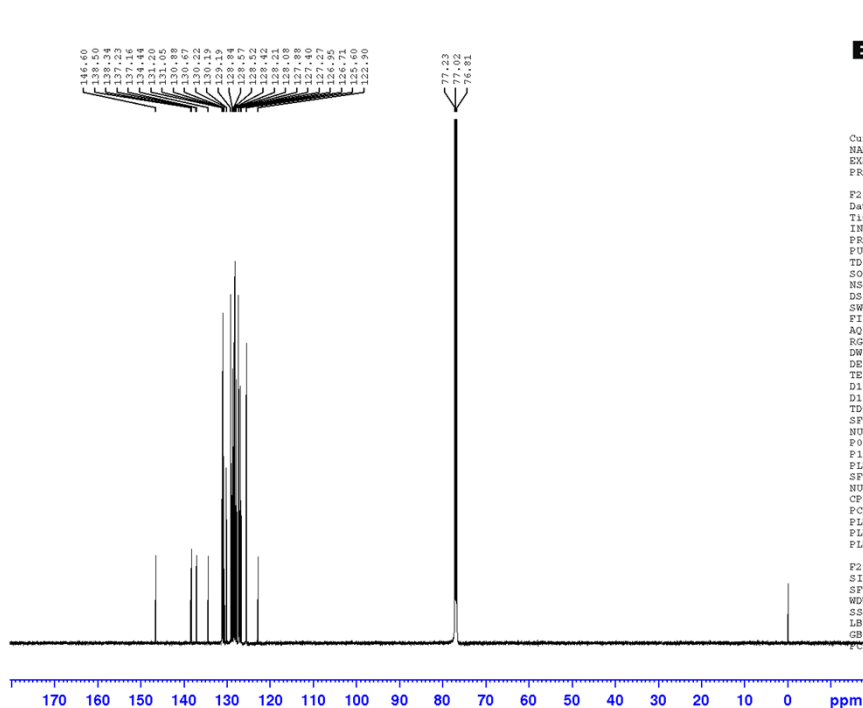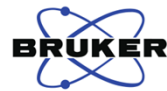

Current Data Parameters  
 NAME RM01-67 CC 19-Aug-19  
 EXPNO 2  
 PROCNO 1

F2 - Acquisition Parameters  
 Date\_ 20190819  
 Time 14.19 h  
 INSTRUM spect  
 PROBHD Z115435\_0005 ( )  
 PULPROG zgpg30  
 TD 65536  
 SOLVENT CDCl3  
 NS 512  
 DS 2  
 SWH 36231.883 Hz  
 FIDRES 1.105709 Hz  
 AQ 0.9043969 sec  
 RG 191.96  
 DW 13.800 usec  
 DE 18.00 usec  
 TE 303.1 K  
 D1 2.0000000 sec  
 D11 0.0300000 sec  
 TD0 1  
 SFO1 150.9178988 MHz  
 NUC1 13C  
 P0 3.73 usec  
 P1 11.20 usec  
 PLW1 26.0000000 W  
 SFO2 600.1324005 MHz  
 NUC2 1H  
 CPDPRG2 waitz16  
 PCPD2 70.00 usec  
 PLW2 19.99799919 W  
 PLW12 0.49383000 W  
 PLW13 0.24839000 W

F2 - Processing parameters  
 SI 32768  
 SF 150.9028079 MHz  
 WDW EM  
 SSB 0  
 LB 1.00 Hz  
 GB 0  
 PC 1.40

<sup>13</sup>C NMR spectrum of 4-(10-bromoanthracen-9-yl)benzonitrile (AnCN)



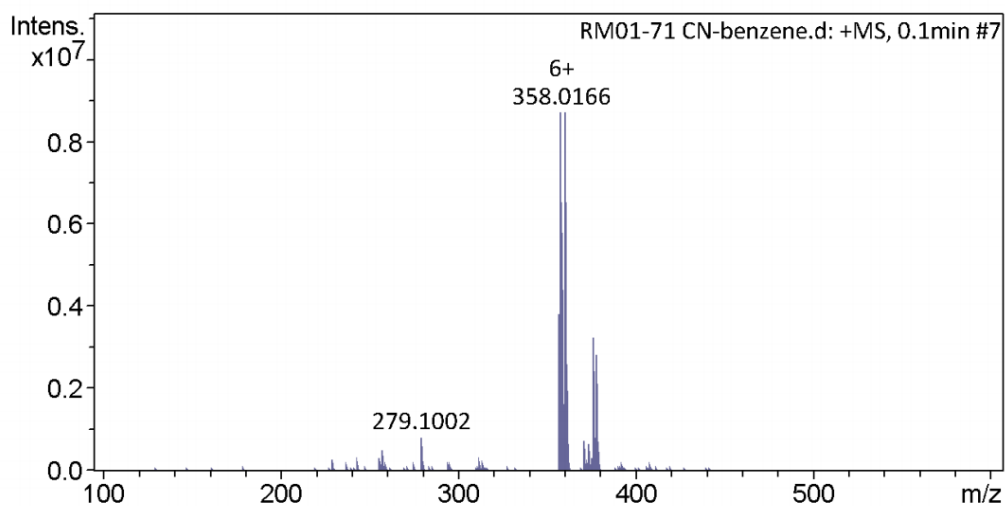

Mass spectrum of 4-(10-bromoanthracen-9-yl)benzonitrile (3)

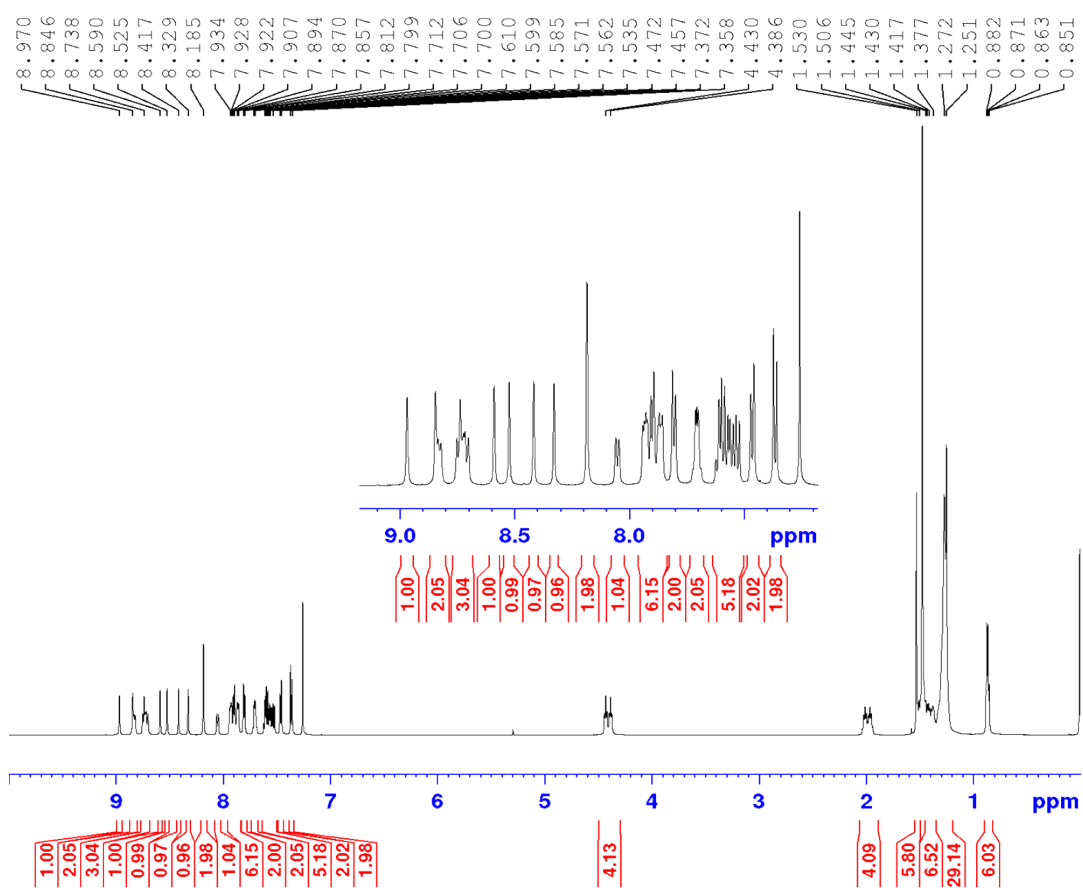

<sup>1</sup>H NMR spectrum of 4-(7-(3'',6''-di-tert-butyl-9,9'-didodecyl-9H,9,2'H-[3,3':6',9''-tercarbazol]-6-yl)triphenyl-2-yl)benzonitrile (CPhCN)

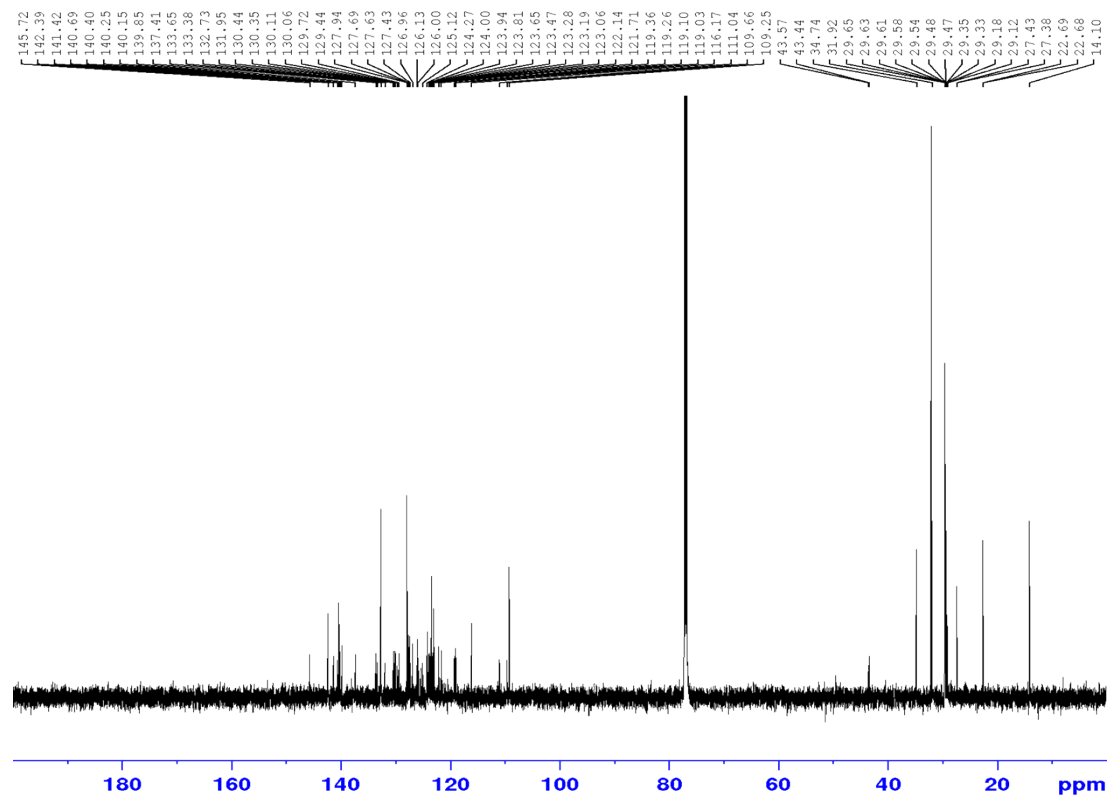

$^{13}\text{C}$  NMR spectrum of 4-(7-(3'',6''-di-tert-butyl-9,9'-didodecyl-9H,9,2'H-[3,3':6',9''-tercarbazol]-6-yl)triphenylen-2-yl)benzotrile (CPhCN)

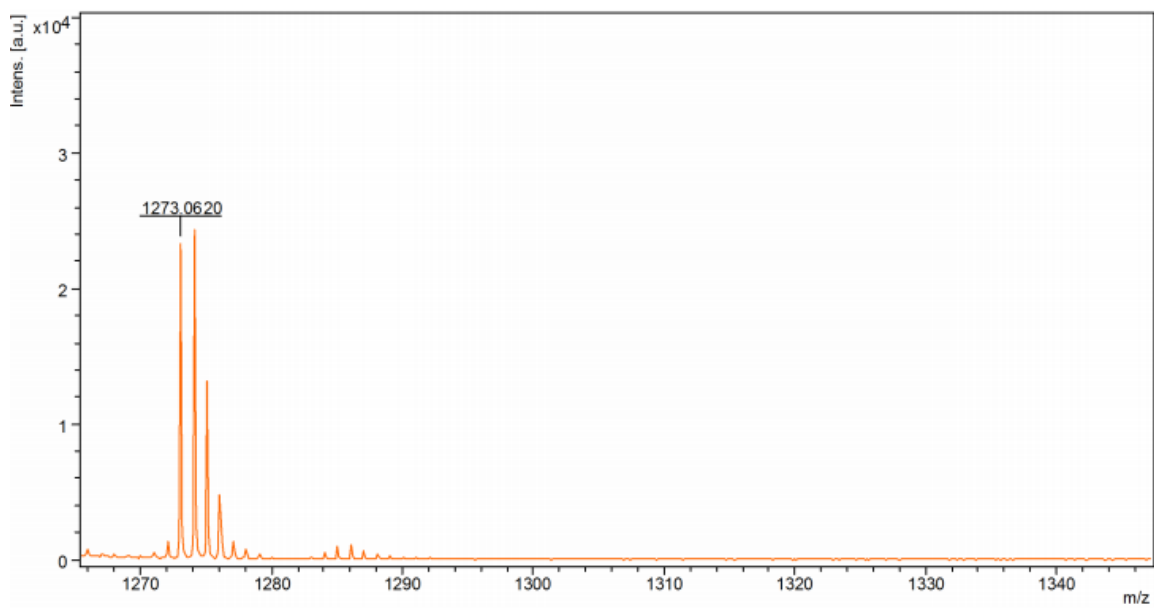

Mass spectrum of 4-(7-(3'',6''-di-tert-butyl-9,9'-didodecyl-9H,9,2'H-[3,3':6',9''-tercarbazol]-6-yl)triphenylen-2-yl)benzotrile (CPhCN)

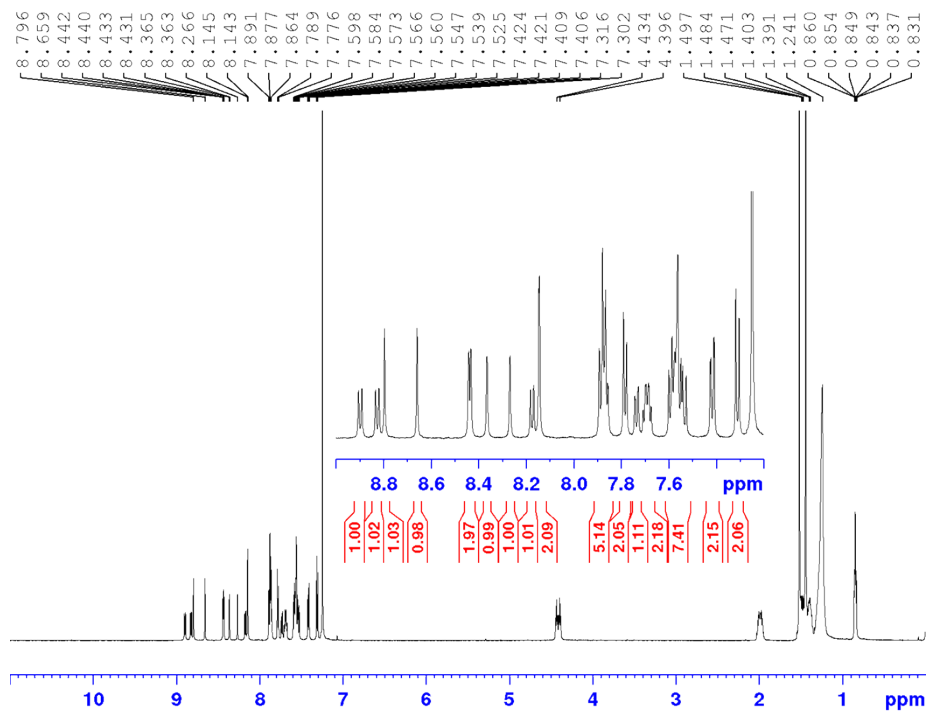

<sup>1</sup>H NMR spectrum of 4-(12-(3'',6''-di-tert-butyl-9,9'-didodecyl-9H,9'H-[3,3':6',9''-tercarbazol]-6-yl)chrysen-6-yl)benzotrile (CCsCN)

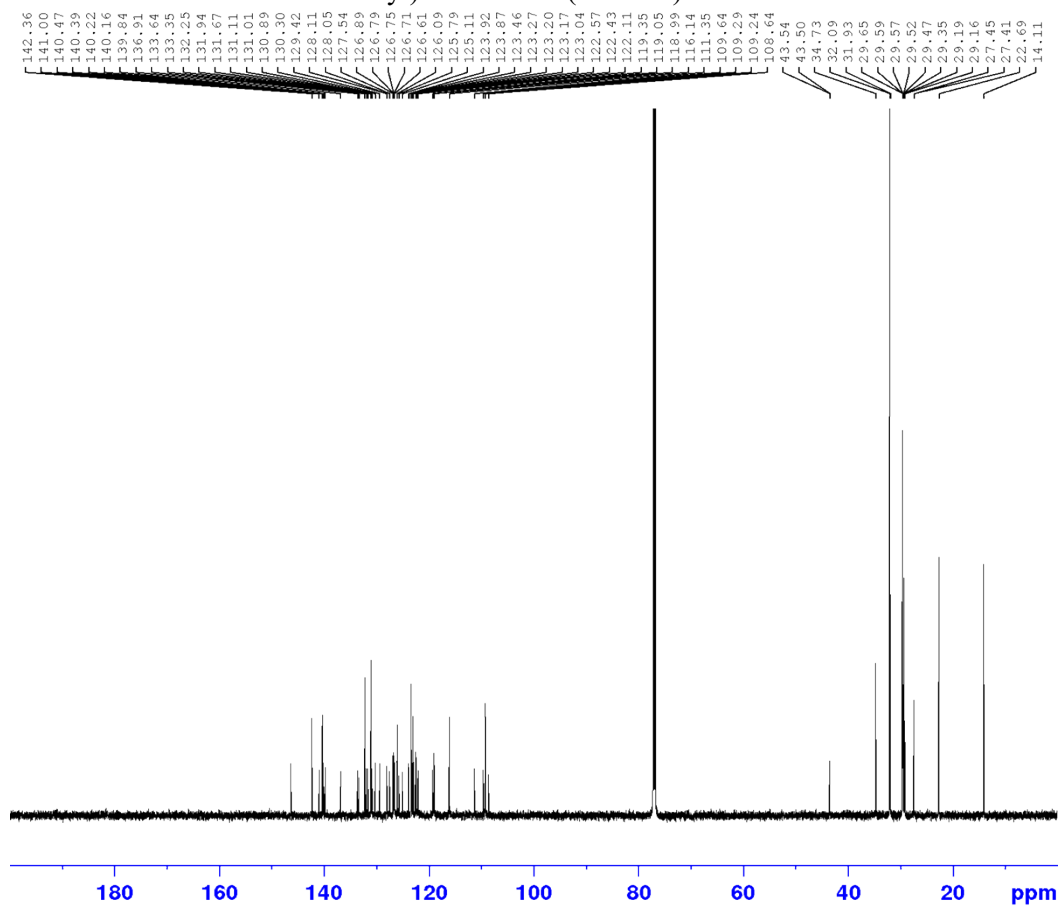

<sup>13</sup>C NMR spectrum of 4-(12-(3'',6''-di-tert-butyl-9,9'-didodecyl-9H,9'H-[3,3':6',9''-tercarbazol]-6-yl)chrysen-6-yl)benzotrile (CCsCN)

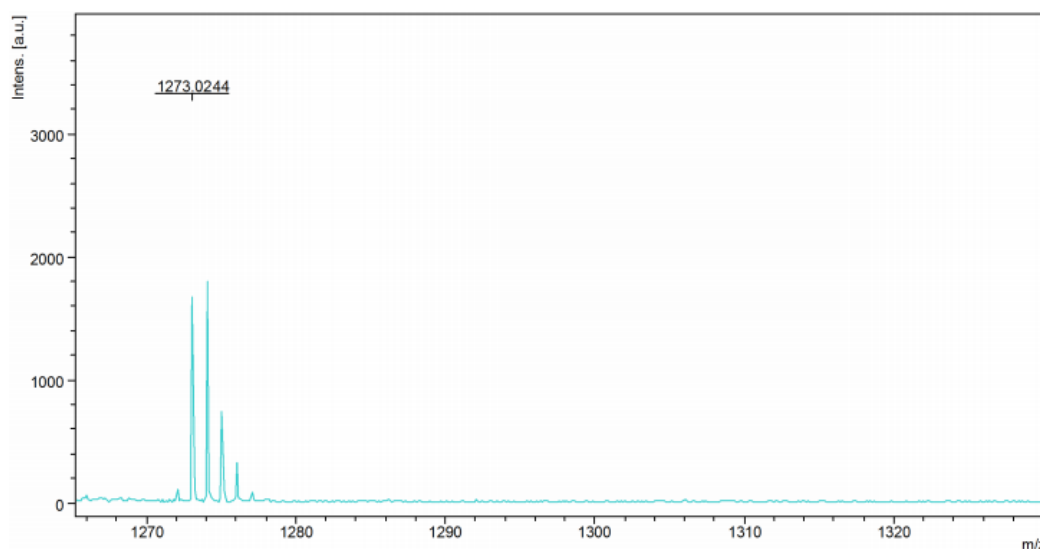

Mass spectrum of 4-(12-(3'',6''-di-tert-butyl-9,9'-didodecyl-9H,9'H-[3,3':6',9''-tercarbazol]-6-yl)chrysen-6-yl)benzotrile (CCsCN)

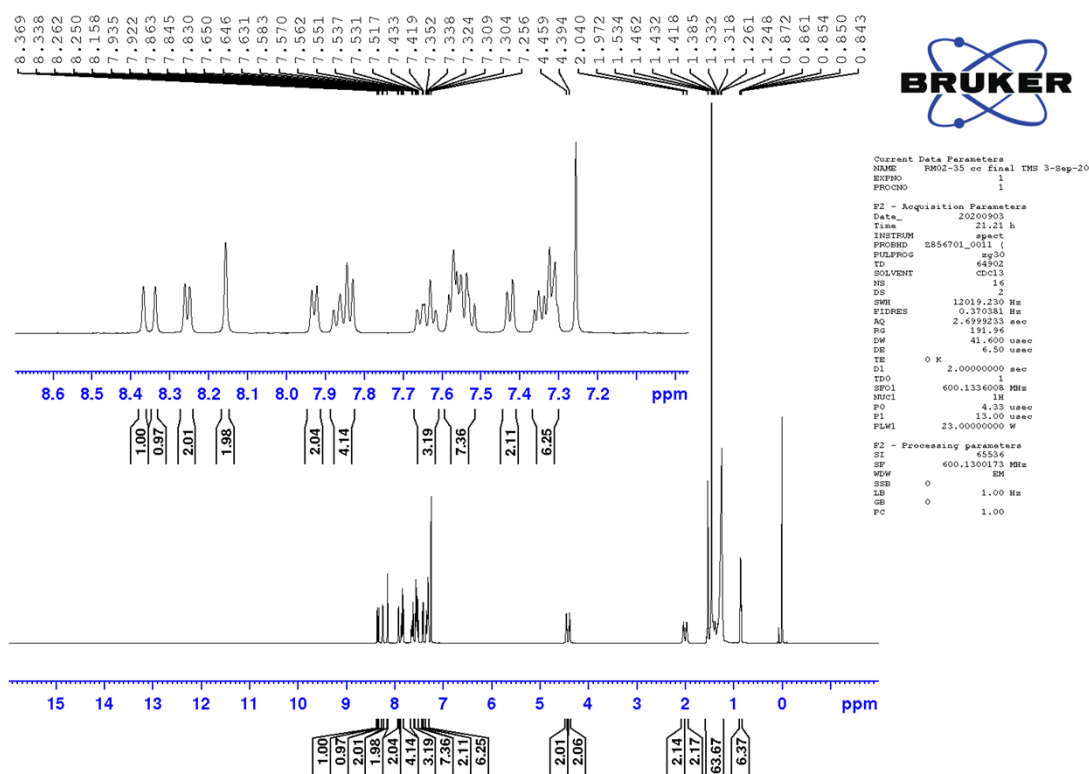

<sup>1</sup>H NMR spectrum of 4-(10-(3'',6''-di-tert-butyl-9,9'-didodecyl-9H,9'H-[3,3':6',9''-tercarbazol]-6-yl)anthracen-9-yl)benzotrile (CAnCN)

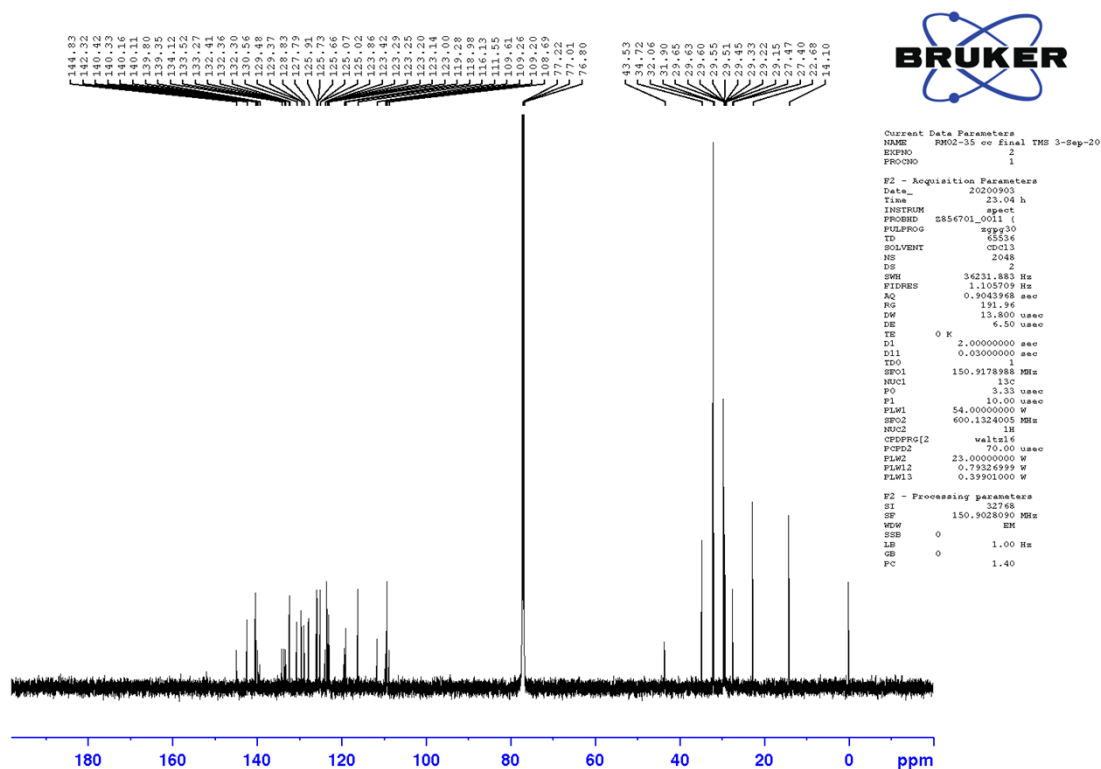

<sup>13</sup>C NMR spectrum of 4-(10-(3',6''-di-tert-butyl-9,9'-didodecyl-9H,9'H-[3,3':6',9''-tercarbazol]-6-yl)anthracen-9-yl)benzotrile (CAnCN)

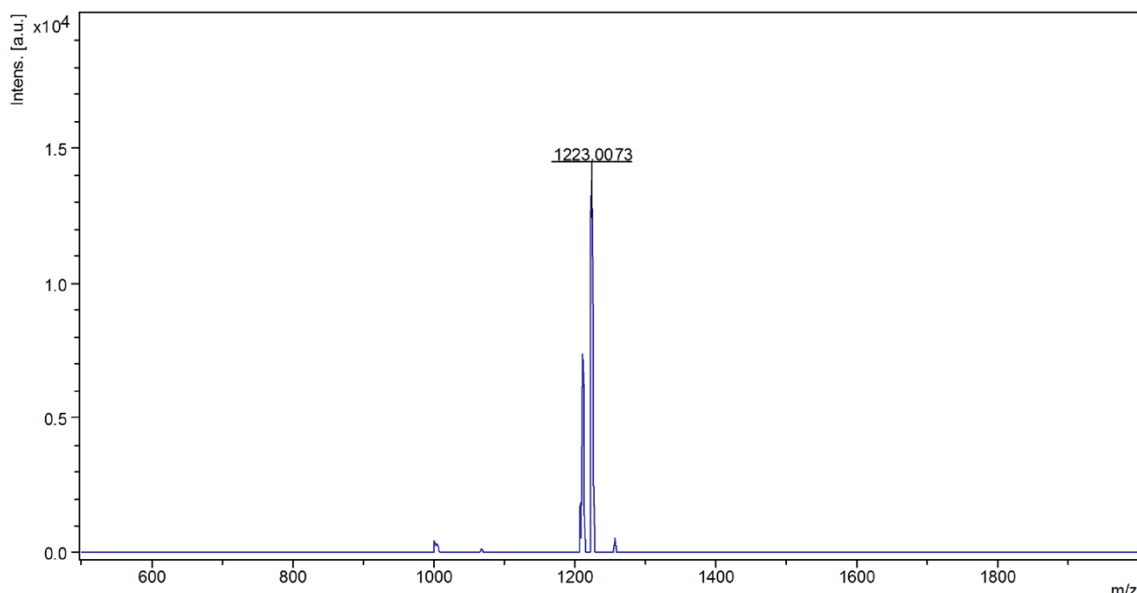

Mass spectrum of 4-(10-(3',6''-di-tert-butyl-9,9'-didodecyl-9H,9'H-[3,3':6',9''-tercarbazol]-6-yl)anthracen-9-yl)benzotrile (CAnCN)
